# Supplementary material
Source: HighWire-hosted journal article supplement (https://www.annfammed.org/highwire/filestream/7832/field_highwire_adjunct_files/0/Naessens_Appendix_1.pdf)
Supplement: Naessens_Appendix_1.pdf [file Naessens_Appendix_1.pdf]

Online Supplementary Material

Naessens JM, Baird M, Van Houten HK, Vanness D, Campbell CR. Predicting persistently high primary care use. *Ann Fam Med.* 2005;3:324-330.

<http://www.annfammed.org/cgi/content/full/3/4/324/DC1>

**Supplemental Appendix 1. Most Frequent Diagnoses Among Patients With a High Use of Primary Care and Among Remaining Patients, 1997**

| Diagnosis (ICD-9-CM)                         | High-Visit Patients |               |                    | Remaining Patients |               |                    |
|----------------------------------------------|---------------------|---------------|--------------------|--------------------|---------------|--------------------|
|                                              | No.                 | No. of Visits | Visits per Patient | No.                | No. of Visits | Visits per Patient |
| V20.2 Routine child health examination       | 200                 | 569           | 2.8                | 3,929              | 6,069         | 1.5                |
| 382.9 Otitis media, NOS                      | 206                 | 718           | 3.5                | 1,861              | 2,795         | 1.5                |
| 465.9 Acute upper respiratory infection, NOS | 230                 | 478           | 2.1                | 2,030              | 2,378         | 1.2                |
| 462 Acute pharyngitis                        | 81                  | 112           | 1.4                | 1,673              | 1,936         | 1.2                |
| 401.9 Hypertension, NOS                      | 47                  | 110           | 2.3                | 840                | 1,349         | 1.6                |
| V72.3 Gynecologic examination                | 46                  | 48            | 1.0                | 1,257              | 1,288         | 1.0                |
| V70.3 Medical examination, administrative    | 13                  | 13            | 1.0                | 1,110              | 1,117         | 1.0                |
| 493.90 Asthma without status asthmaticus     | 59                  | 126           | 2.1                | 740                | 994           | 1.3                |
| V22.2 Pregnant state*                        | 78                  | 670           | 8.6                | 79                 | 202           | 2.6                |
| 692.9 Dermatitis, NOS                        | 64                  | 77            | 1.2                | 703                | 770           | 1.1                |
| 311 Depressive disorder                      | 52                  | 229           | 4.4                | 285                | 418           | 1.5                |
| V43.3 Heart valve replacement status*        | 17                  | 150           | 8.8                | 5                  | 15            | 3.0                |
| 451.19 Deep phlebitis – leg, NEC*            | 13                  | 128           | 9.8                | 11                 | 31            | 2.8                |
| 427.31 Atrial fibrillation*                  | 13                  | 127           | 9.8                | 17                 | 38            | 2.2                |
| Total                                        | 987                 | 12,437        | 12.6               | 45,222             | 61,488        | 1.4                |

\* Conditions with high frequency among high-visit patients.

ICD-9-CM = International Classification of Disease, Ninth Revision, Clinical Modification; NOS = not otherwise specified; NEC = not elsewhere classified.
